# Supplementary material
Source: PubMed Central journal article supplement (PMC11376949)
Supplement: PBI-21-1682-s002.pdf [file PBI-21-1682-s002.pdf]

1 **Article title: The AP2/ERF transcription factor TOE4b regulates photoperiodic**  
2 **flowering and grain yield per plant in soybean**

3 Haiyang Li<sup>+</sup>, Haiping Du<sup>+</sup>, Zerong Huang<sup>+</sup>, Milan He, Lingping Kong, Chao Fang, Liyu  
4 Chen, Hui Yang, Yuhang Zhang, Baohui Liu\*, Fanjiang Kong\*, Xiaohui Zhao\*

5  
6 **Supporting Information:**

7 **Supporting figures:**

8 **Figure S1** Genome-wide averaged distance of linkage disequilibrium decayed.  
9 Calculation via squared correlations of allele frequencies ( $r^2$ ) against the distance  
10 between polymorphic sites in wild soybeans, landraces and cultivars.

11 **Figure S2** Expression of 15 genes in the linkage disequilibrium block in the leaves and  
12 stem tips. (a) Data are from transcriptomic analysis in wild-type W82. The values  
13 represent RPKM value of genes in transcriptome. Data are presented as means  $\pm$  SD of  
14 two biological replicates. (b) Data are from Phytozome 13 ([https://phytozome-](https://phytozome-next.jgi.doe.gov/)  
15 [next.jgi.doe.gov/](https://phytozome-next.jgi.doe.gov/)). FPKM (Fragments Per Kilobase of exon model per Million mapped  
16 reads).

17 **Figure S3** Natural variation of *TOE4b*. (a) Summary of *TOE4b* haplotypes across a  
18 diversity panel comprising 1,744 soybean accessions. (b) Origin tree of the *TOE4b*  
19 haplotypes. The data are from 1,744 accessions, consisting of 221 wild soybeans, 516  
20 landraces, and 874 improved cultivars. The red arrows indicate the direction of  
21 evolution.

22 **Figure S4** *TOE4b*<sup>H4</sup> variation affects one of the conserved AP2 domain. (a) Alignment  
23 of the amino acid sequences of TOE4b with its orthologs and homologs. Amino acid  
24 sequences from *Glycine max*, *Phaseolus vulgaris*, *Medicago truncatula*, *Arabidopsis*  
25 *thaliana* and *Oryza sativa* were aligned by Clustal W. The red asterisk indicates the  
26 amino acid in TOE4b<sup>H4</sup> that changes from the conserved G residue to S. (b) CAPS  
27 marker for the identification of the *TOE4b*<sup>H1</sup> and *TOE4b*<sup>H4</sup> alleles. PCR products were  
28 digested with the restriction enzyme *Hae*III. Hetero, heterozygous plant.

29 **Figure S5** Effects of combination of *TOE4b* and *E2* alleles on soybean flowering time.

30 (a, b) Flowering time of six allelic combinations between *TOE4b* and *E2* across 449  
31 soybean accessions grown in Harbin in 2017 (a) and 2020 (b). The number above the  
32 *x*-axis represents the number of samples. Different lowercase letters indicate significant  
33 differences. The phenotype with 2 samples was not statistically analyzed with other  
34 samples.

35 **Figure S6** Generation *TOE4b* overexpression lines in soybean. (a) Relative transcript  
36 levels of *TOE4b* in wild-type W82 and T1 overexpression transgenic plants. *β-Tubulin*  
37 (*TUB*) was used as a normalization transcript. (b) Abundance of TOE4b-3Flag in the  
38 leaves of T<sub>1</sub> transgenic plants, as determined by immunoblotting using anti-Flag  
39 antibodies. The non-specific band (NS) was used as a loading control.

40 **Figure S7** Phenotypes of *TOE4b* mutant and overexpression lines. Agronomic traits of  
41 plant height (a, c, e), measured from the cotyledonary node of the main stem to the apex  
42 in centimeters; number of nodes (b, d, f). The plants were grown in an incubator under  
43 LD (16-h light/8-h dark) (a-b) or SD (12-h light/12-h dark) conditions with an average  
44 photon flux of 300  $\mu\text{mol m}^{-2} \text{s}^{-1}$  (c-d). For the mutant plants were grown in an incubator  
45 under LD (16-h light/8-h dark) with an average photon flux of 450  $\mu\text{mol m}^{-2} \text{s}^{-1}$  (e-f).  
46 W82, wild-type Williams 82. Five plants were scored for each phenotype; data are  
47 means  $\pm$  SD.  $P < 0.05$ , as determined by multiple comparison testing by one-way  
48 ANOVA. Different lowercase letters indicate significant differences.

49 **Figure S8** Agronomic traits associated with the major haplotypes of *TOE4b*.  
50 Agronomic trait of plant height (a), measured from the cotyledonary node of the main  
51 stem to the apex in centimeters; number of nodes (b); average of internode length (c);  
52 branch number per plant (d); pod number per plant (e); and grain weight per plant (f).  
53 *TOE4b<sup>H1</sup>*, n = 68; *TOE4b<sup>H4</sup>*, n = 83. The plants were grown in a standard field in Harbin  
54 under natural conditions in 2017. At least 6 plants were scored for each phenotype; data  
55 are means  $\pm$  SD.  $P < 0.05$ , two-tailed Student's *t*-test. Different lowercase letters  
56 indicate significant differences.

57

#### 58 **Supporting tables:**

59 **Table S1** Significant loci associated with flowering time identified through GWAS.

60 **Table S2** The  $-\log_{10}(p)$  values of significant loci associated with flowering time for  
61 GWAS.

62 **Table S3** Information of candidate genes within LD block.

63 **Table S4** Transcription levels of the 15 genes in the leaves and stem tips.

64 **Table S5** List of soybean accessions used for GWAS.

65 **Table S6** Primers used in this study.

66

## 67 **References**

68 Bailey M, Ivanauskaite A, Grimmer J, Akintewe O, Payne AC, Osborne R, Labandera  
69 AM, Etherington RD, Rantala M, Baginsky S *et al.* 2021. The *Arabidopsis* *NOT4A*  
70 E3 ligase promotes *PGR3* expression and regulates chloroplast translation. *Nat*  
71 *Commun* **12**: 251.

72 Guan X, Okazaki Y, Zhang R, Saito K, Nikolau BJ. 2020. Dual-localized enzymatic  
73 components constitute the fatty acid synthase systems in mitochondria and plastids.  
74 *Plant Physiol* **183**: 517-529.

75 Hasi Q, Kakimoto T. 2022. ROP interactive partners are involved in the control of cell  
76 division patterns in *Arabidopsis* leaves. *Plant Cell Physiol* **63**: 1130-1139.

77 Lee TA, Bailey-Serres J. 2019. Integrative analysis from the epigenome to transcriptome  
78 uncovers patterns of dominant nuclear regulation during transient stress. *Plant*  
79 *Cell* **31**: 2573-2595.

80 Li B, Byrt C, Qiu J, Baumann U, Hrmova M, Evrard A, Johnson AA, Birnbaum KD,  
81 Mayo GM, Jha D *et al.* 2016. Identification of a stelar-localized transport protein  
82 that facilitates root-to-shoot transfer of chloride in *Arabidopsis*. *Plant Physiol* **170**:  
83 1014-29.

84 Lupanga U, Röhrich R, Askani J, Hilmer S, Kiefer C, Krebs M, Kanazawa T, Ueda T,  
85 Schumacher K. 2020. The *Arabidopsis* V-ATPase is localized to the TGN/EE via  
86 a seed plant-specific motif. *Elife* **9**: e60568.

87 Tan YF, O'Toole N, Taylor NL, Millar AH. 2010. Divalent metal ions in plant  
88 mitochondria and their role in interactions with proteins and oxidative stress-

89 induced damage to respiratory function. *Plant Physiol* **152**: 747-61.

90 Xu C, Min JR. 2011. Structure and function of WD40 domain proteins. *Protein Cell* **2**:  
91 202-214.

92 Zhang A, Matsuoka K, Kareem A, Robert M, Roszak P, Blob B, Bisht A, De Veylder L,  
93 Voiniciuc C, Asahina M *et al.* 2022. Cell-wall damage activates DOF transcription  
94 factors to promote wound healing and tissue regeneration in *Arabidopsis thaliana*.  
95 *Curr Biol* **32**: 1883-1894.e7.

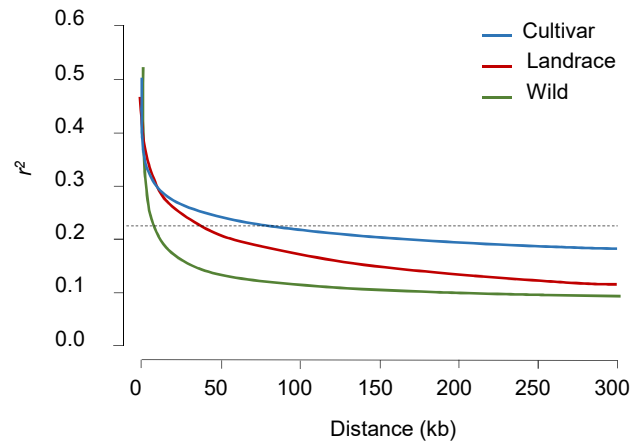

**Figure S1** Genome-wide averaged distance of linkage disequilibrium decayed. Calculation via squared correlations of allele frequencies ( $r^2$ ) against the distance between polymorphic sites in wild soybeans, landraces and cultivars.

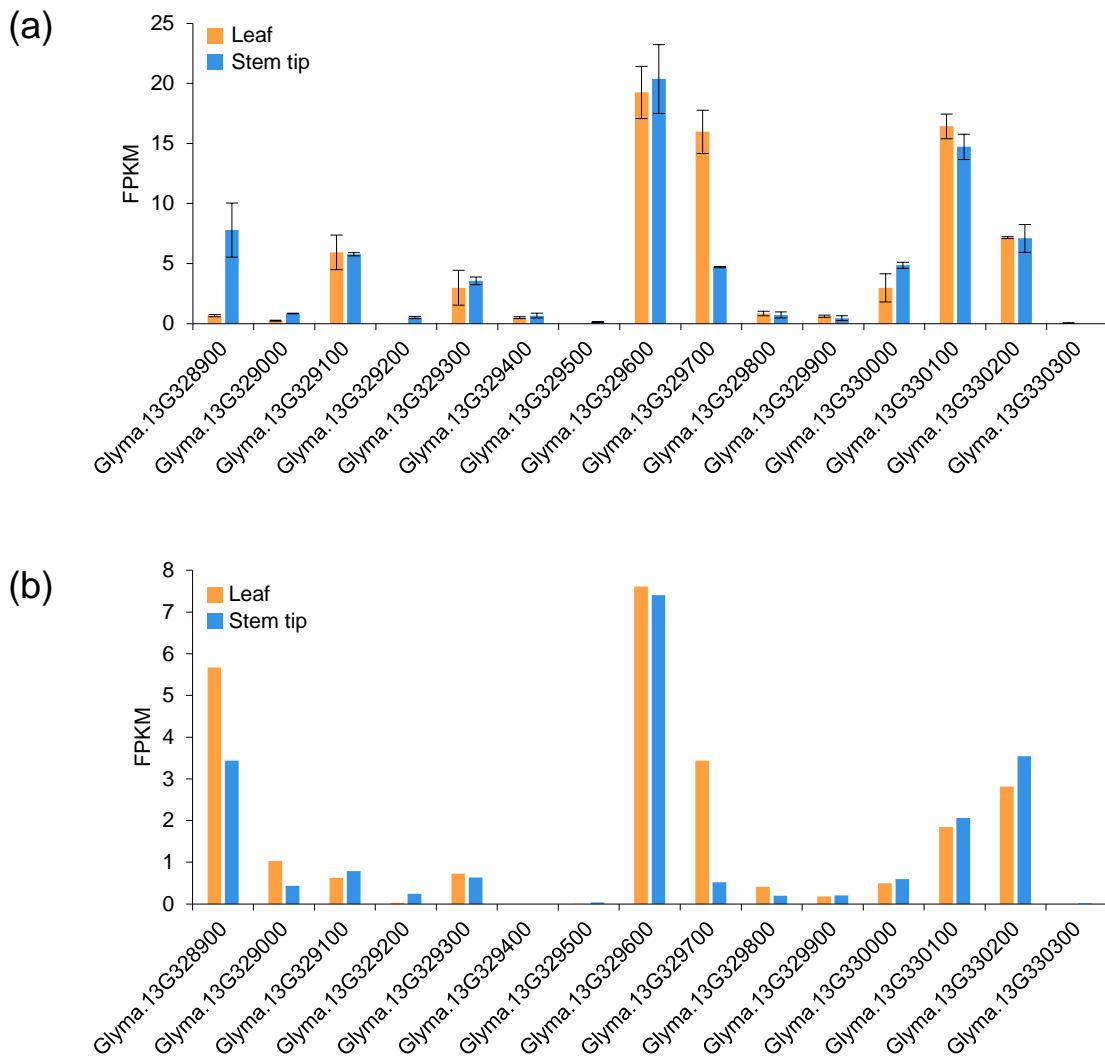

**Figure S2** Expression of 15 genes in the linkage disequilibrium block in the leaves and stem tips. (a) Data are from transcriptomic analysis in wild-type W82. The values represent RPKM value of genes in transcriptome. Data are presented as means  $\pm$  SD of two biological replicates. (b) Data are from Phytozome 13 (<https://phytozome-next.jgi.doe.gov/>). FPKM (Fragments Per Kilobase of exon model per Million mapped reads).

(a)

| Reference Genome W82 | Haplotype |     |     |     |     |     |     |     |      |   | Number |
|----------------------|-----------|-----|-----|-----|-----|-----|-----|-----|------|---|--------|
| <i>TOE4b</i>         | H1        | G   | T   | G   | C   | G   | C   | C   | A    | C | 1189   |
|                      | H2        | G   | A   | G   | A   | G   | C   | C   | A    | C | 69     |
|                      | H3        | G   | T   | A   | C   | G   | C   | C   | A    | C | 52     |
|                      | H4        | G   | T   | G   | C   | A   | C   | C   | A    | C | 283    |
|                      | H5        | C   | T   | G   | A   | G   | C   | C   | A    | C | 4      |
|                      | H6        | G   | A   | G   | A   | G   | C   | C   | C    | C | 1      |
|                      | H7        | G   | T   | G   | C   | G   | A   | C   | A    | C | 1      |
|                      | H8        | G   | T   | G   | C   | G   | C   | A   | A    | C | 1      |
|                      | H9        | G   | T   | G   | C   | G   | C   | C   | C    | C | 6      |
|                      | H10       | G   | T   | G   | C   | G   | C   | C   | A    | A | 5      |
| CDS nt # in W82      | 245       | 283 | 306 | 328 | 715 | 841 | 848 | 958 | 1086 |   |        |
| AA # in W82          | 82        | 95  | 102 | 110 | 239 | 281 | 283 | 320 | 362  |   |        |
| AA identified in W82 | S         | F   | M   | H   | G   | P   | A   | N   | F    |   |        |
| AA change            | T         | I   | I   | N   | S   | T   | D   | H   | L    |   |        |

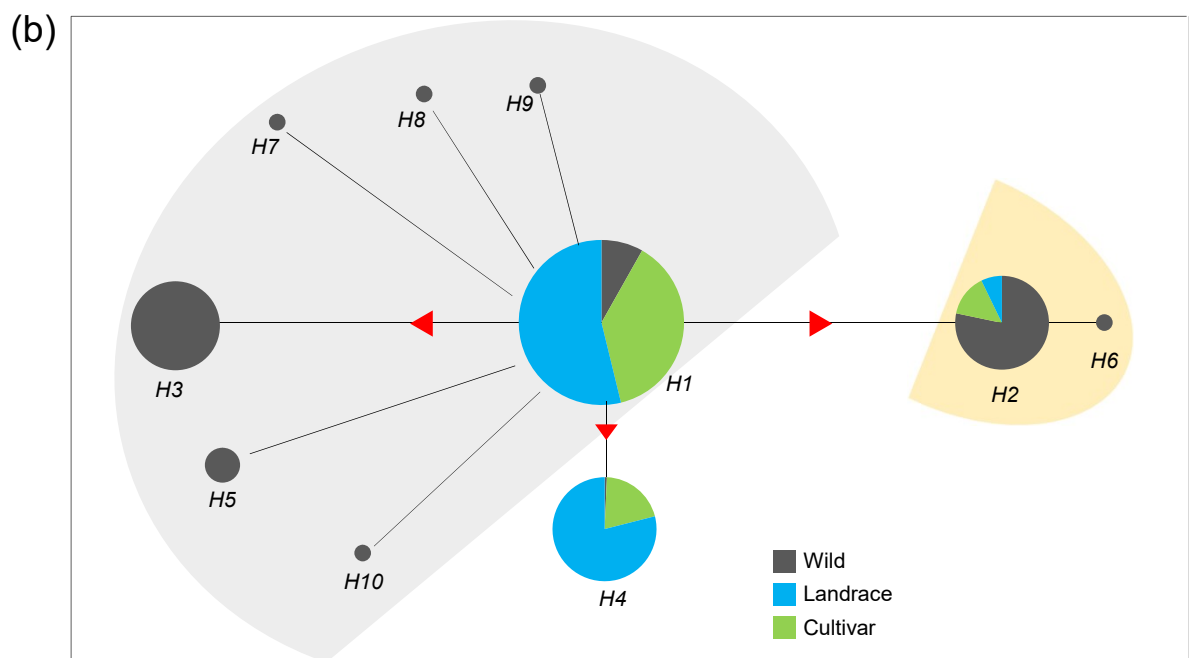

**Figure S3** Natural variation of *TOE4b*. (a) Summary of *TOE4b* haplotypes across a diversity panel comprising 1,744 soybean accessions. (b) Origin tree of the *TOE4b* haplotypes. The data are from 1,744 accessions, consisting of 221 wild soybeans, 516 landraces, and 874 improved cultivars. The red arrows indicate the direction of evolution.

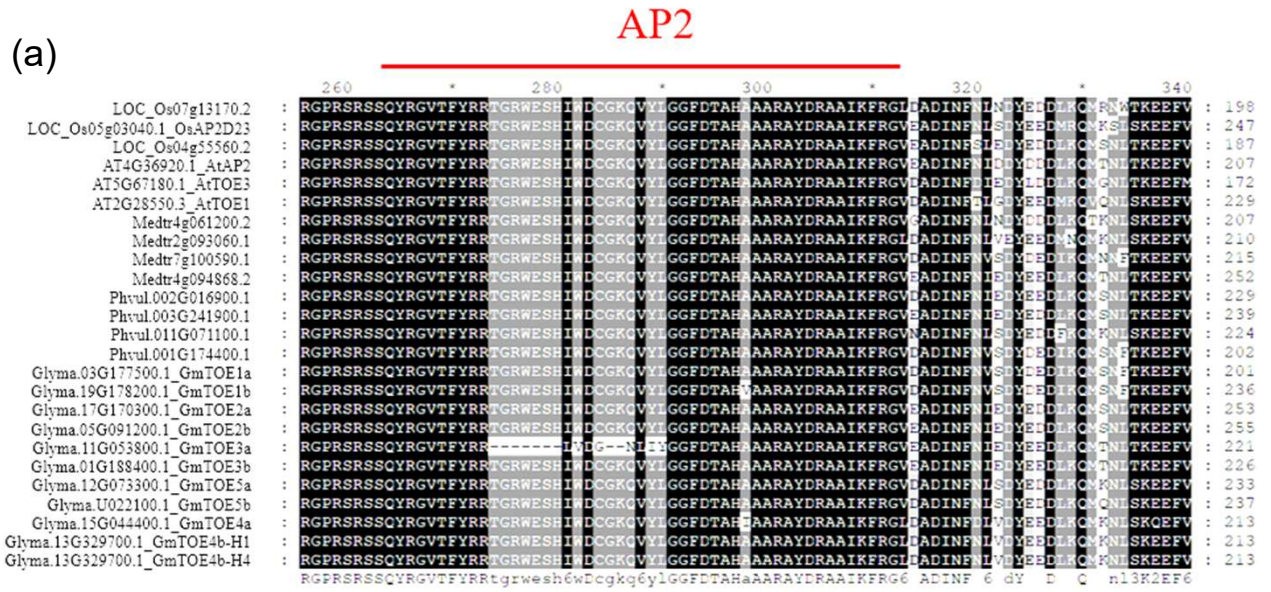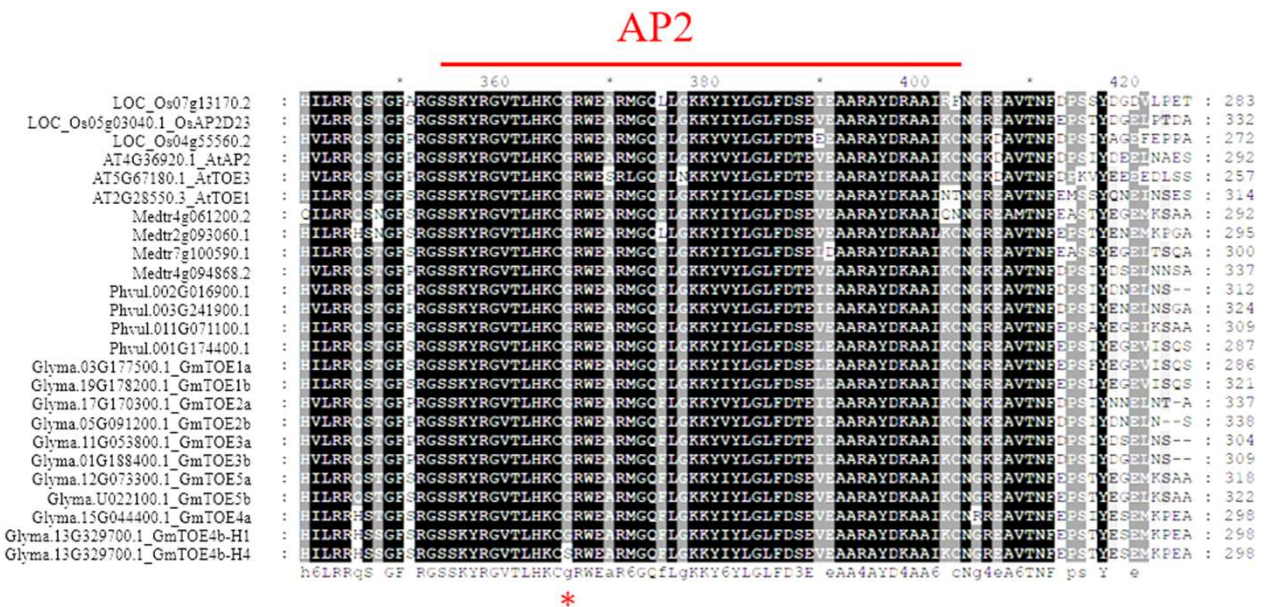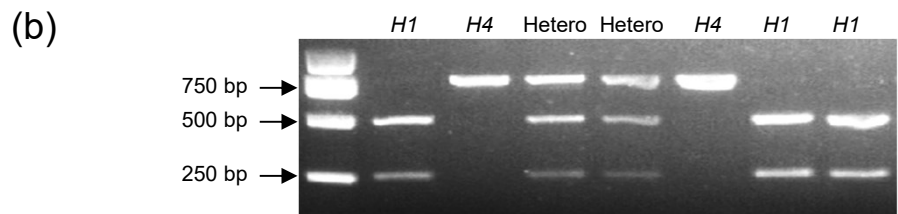

**Figure S4** *TOE4b<sup>H4</sup>* variation affects one of the conserved AP2 domain. (a) Alignment of the amino acid sequences of *TOE4b* with its orthologs and homologs. Amino acid sequences from *Glycine max*, *Phaseolus vulgaris*, *Medicago truncatula*, *Arabidopsis thaliana* and *Oryza sativa* were aligned by Clustal W. The red asterisk indicates the amino acid in *TOE4b<sup>H4</sup>* that changes from the conserved G residue to S. (b) CAPS marker for the identification of the *TOE4b<sup>H1</sup>* and *TOE4b<sup>H4</sup>* alleles. PCR products were digested with the restriction enzyme *HaeIII*. Hetero, heterozygous plant.



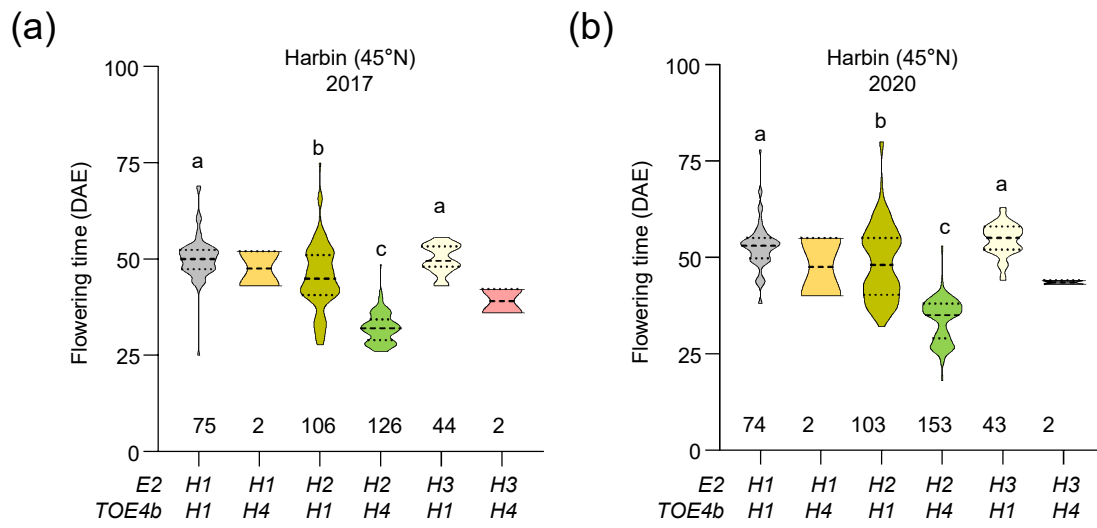

**Figure S5** Effects of combination of *TOE4b* and *E2* alleles on soybean flowering time. (a, b) Flowering time of six allelic combinations between *TOE4b* and *E2* across 449 soybean accessions grown in Harbin in 2017 (a) and 2020 (b). The number above the x-axis represents the number of samples. Different lowercase letters indicate significant differences. The phenotype with 2 samples was not statistically analyzed with other samples.

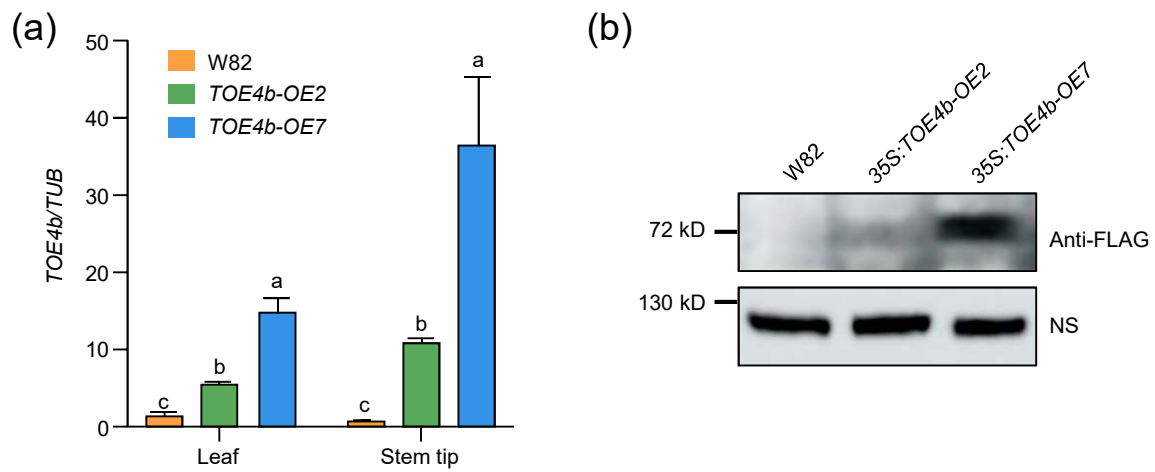

**Figure S6** Generation *TOE4b* overexpression lines in soybean. (a) Relative transcript levels of *TOE4b* in wild-type W82 and T<sub>1</sub> overexpression transgenic plants.  $\beta$ -*Tubulin* (*TUB*) was used as a normalization transcript. (b) Abundance of *TOE4b-3Flag* in the leaves of T<sub>1</sub> transgenic plants, as determined by immunoblotting using anti-Flag antibodies. The non-specific band (NS) was used as a loading control.

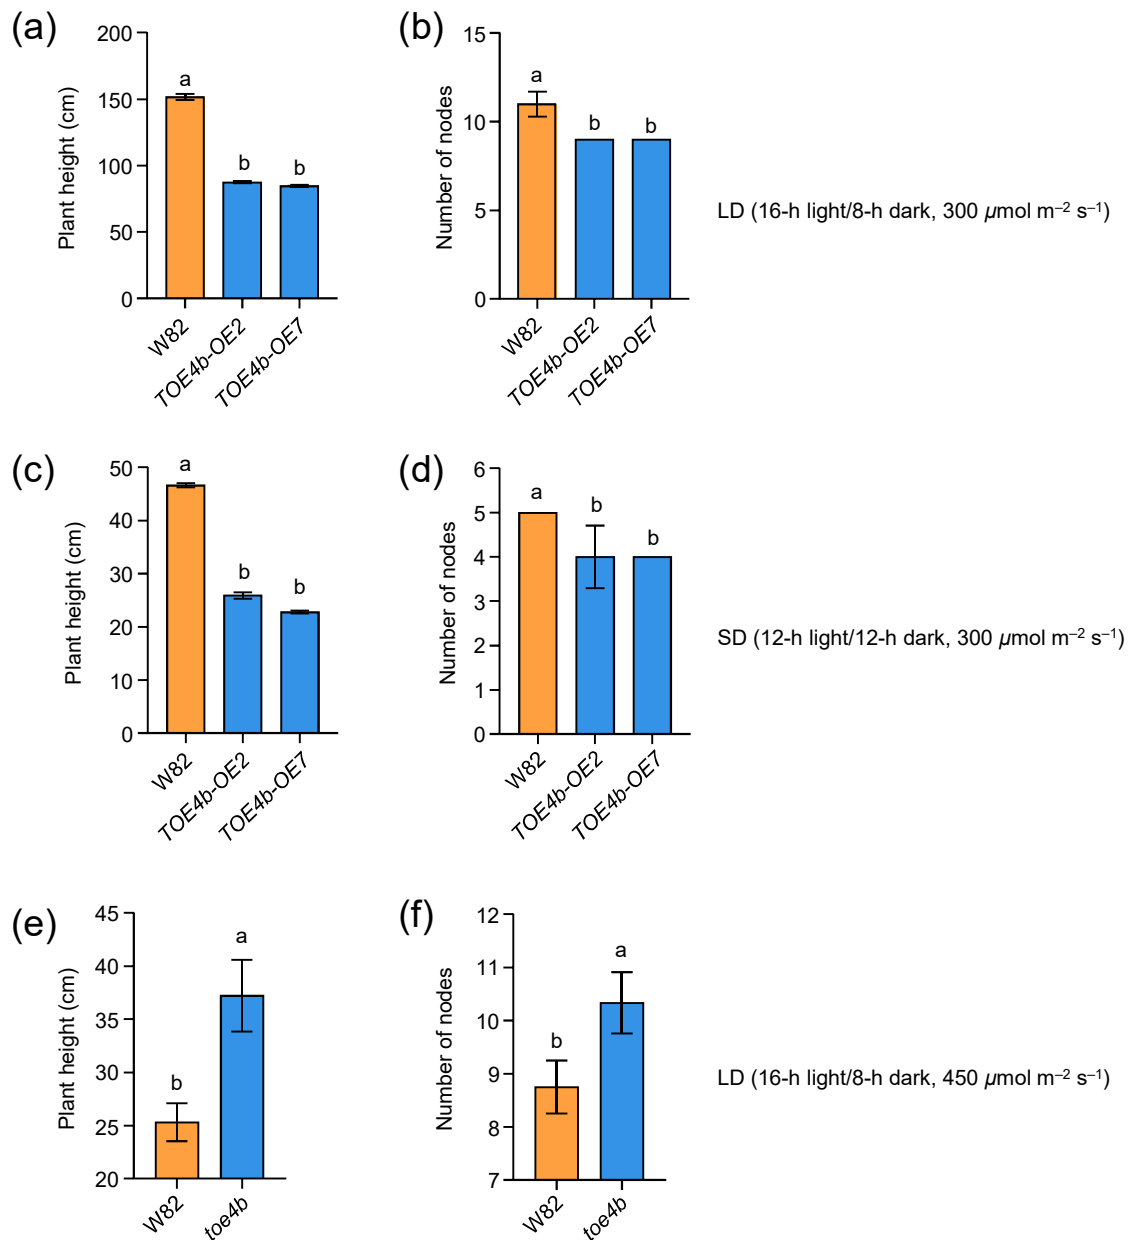

**Figure S7** Phenotypes of *TOE4b* mutant and overexpression lines. Agronomic traits of plant height (a, c, e), measured from the cotyledonary node of the main stem to the apex in centimeters; number of nodes (b, d, f). The plants were grown in an incubator under LD (16-h light/8-h dark) (a-b) or SD (12-h light/12-h dark) conditions with an average photon flux of 300  $\mu\text{mol m}^{-2} \text{s}^{-1}$  (c-d). For the mutant plants were grown in an incubator under LD (16-h light/8-h dark) with an average photon flux of 450  $\mu\text{mol m}^{-2} \text{s}^{-1}$  (e-f). W82, wild-type Williams 82. Five plants were scored for each phenotype; data are means  $\pm$  SD.  $P < 0.05$ , as determined by multiple comparison testing by one-way ANOVA. Different lowercase letters indicate significant differences.

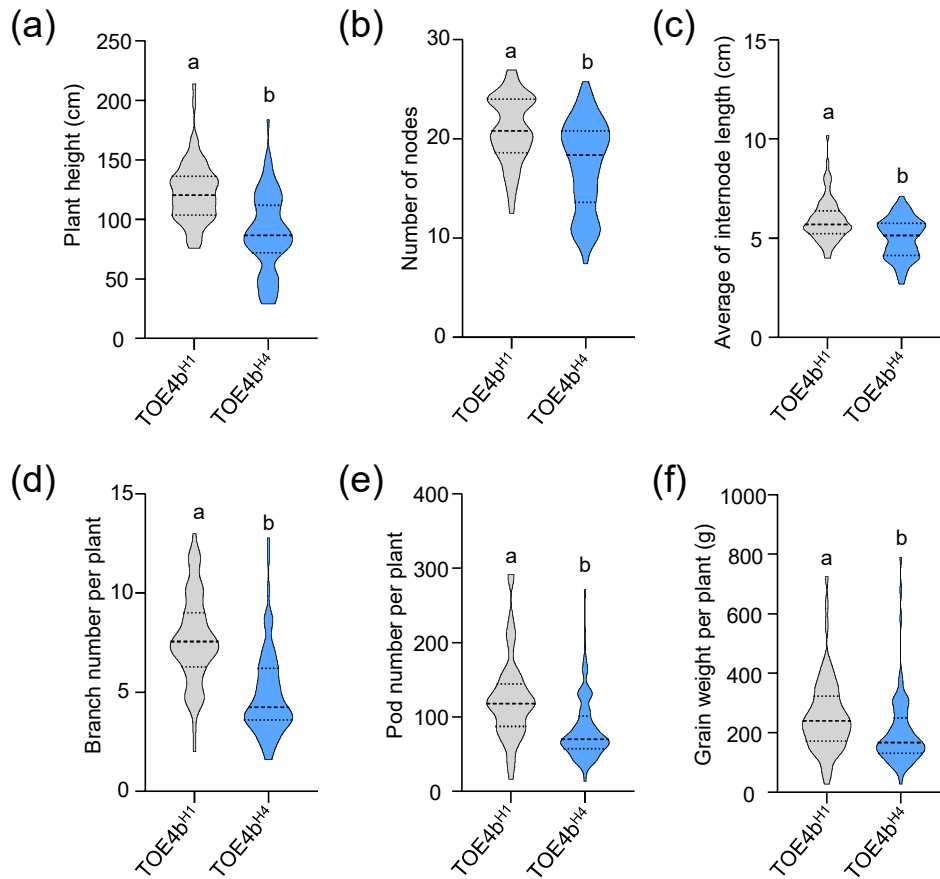

**Figure S8** Agronomic traits associated with the major haplotypes of *TOE4b*. Agronomic trait of plant height (a), measured from the cotyledonary node of the main stem to the apex in centimeters; number of nodes (b); average of internode length (c); branch number per plant (d); pod number per plant (e); and grain weight per plant (f). *TOE4b<sup>H1</sup>*,  $n = 68$ ; *TOE4b<sup>H4</sup>*,  $n = 83$ . The plants were grown in a standard field in Harbin under natural conditions in 2017. At least 6 plants were scored for each phenotype; data are means  $\pm$  SD.  $P < 0.05$ , two-tailed Student's *t*-test. Different lowercase letters indicate significant differences.
